# Supplementary material for: Rational direct synthesis of [Fe(Htrz)2(trz)](BF4) polymorphs: temperature and concentration effects
Source: Royal Society of Chemistry journal article supplement (doi:10.1039/d1qi00482d), 2021-01-01

## Supporting information

### Rational direct synthesis of $[\text{Fe}(\text{Htrz})_2(\text{trz})](\text{BF}_4)$ polymorphs: temperature and concentration effects.

Marlène Palluel, Liza El Khoury, Nathalie Daro, Sonia Buffière, Michaël Josse, Mathieu Marchivie, Guillaume Chastanet

Content :

- Synthesis procedure of  $[\text{Fe}(\text{Htrz})_2(\text{trz})](\text{PF}_6)$ .
- **Figure SI1:** Thermal dependence of the  $\chi_{\text{M}}T$  product of  $[\text{Fe}(\text{Htrz})_2(\text{trz})](\text{PF}_6)$ .
- **Figure SI2:** X-Ray powder pattern of the  $[\text{Fe}(\text{Htrz})_2(\text{trz})](\text{PF}_6)$ .
- **Figure SI3:** Crystal packing of the polymeric chains of  $[\text{Fe}(\text{Htrz})_2(\text{trz})](\text{PF}_6)$  compared to  $[\text{Fe}(\text{Htrz})_2(\text{trz})](\text{BF}_4)$ .
- **Figure SI4:** X-Ray powder pattern of the  $[\text{Fe}(\text{Htrz})_2(\text{trz})](\text{BF}_4)$  polymorph II.
- **Table SI1:** Magnetic data recorded for all 16 compounds.
- **Figure SI5:** TEM images of the 16 compounds.
- **Figure SI6:** PXRD patterns of the 16 compounds.
- **Figure SI7:** Thermal dependence of the  $\chi_{\text{M}}T$  product of the 16 compounds.

## Synthesis procedure of $[\text{Fe}(\text{Htrz})_2(\text{trz})](\text{PF}_6)$

The synthesis of  $[\text{Fe}(\text{Htrz})_2(\text{trz})](\text{PF}_6)$  consists first in an anion exchange between the  $\text{SO}_4^{2-}$  of the  $\text{FeSO}_4$  salt and the  $\text{PF}_6^-$  of the  $\text{KPF}_6$  to give the  $\text{Fe}(\text{PF}_6)_2$  (in solution) followed by its reaction with the triazole ligand.

$\text{FeSO}_4$  (16 mmol) and the  $\text{KPF}_6$  (32 mmol) are dissolved in 14 mL of water in a 50 mL round flask closed by a glass stopper with some ascorbic acid to prevent oxidation of the Fe(II). The overall is stirred at 80 °C for 2 h 30 leading to a light green solution. After cooling to room temperature, 16 mL of ethanol are added to precipitate the  $\text{K}_2\text{SO}_4$  and the solution is stirred one hour more. The precipitate of  $\text{K}_2\text{SO}_4$  is removed from the  $\text{Fe}(\text{PF}_6)_2$  solution by filtration and washed once with about 50 mL of ethanol. The filtrated solution is put into a fridge during 1 h to favor the precipitation of the remained solubilized  $\text{K}_2\text{SO}_4$  and further filtrated and washed with 16 mL of ethanol. This operation is repeated one more time. Then, a solution of 16 mmol of Htrz in 14 mL of ethanol is prepared and added dropwise to the  $\text{Fe}(\text{PF}_6)_2$  solution with magnetic stirring and reflux at 80 °C under  $\text{N}_2$  atmosphere. After 15 min, the white suspension is obtained and let to cool down at 5 °C (into a fridge) during 1 h to promote precipitation. After centrifugation (12 000 rcf, 5 minutes) of the suspension, the precipitate is washed twice with ethanol and once with diethyl ether (with 50 mL each time). For these washing steps, the precipitate is separated from the solvent by the same procedure of centrifugation. The precipitate is then let to dry at RT under ambient atmosphere overnight and a white powder is obtained.

**Figure S11:** Thermal dependence of the  $\chi_M T$  product recorded at 15 kOe at the temperature scan rate of 5 K/min of  $[\text{Fe}(\text{Htrz})_2(\text{trz})](\text{PF}_6)$ . This measurement has been obtained using a Vibrating Sample Magnetometer.

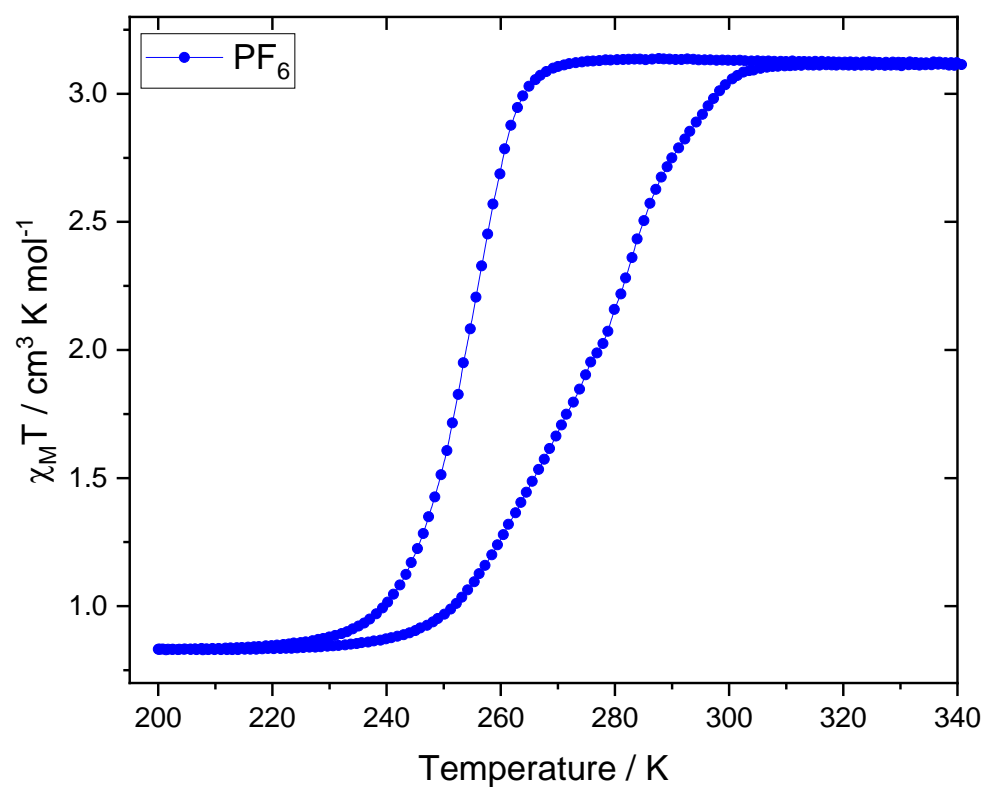

**Figure S12:** X-Ray powder pattern of the  $[\text{Fe}(\text{Htrz})_2(\text{trz})](\text{PF}_6)$ , black crosses are experimental data, red continuous line is the calculated pattern from Rietveld refinement, continuous green line is the difference curve and blue lines represent the Bragg peak positions ( $R_p = 0.059$ ;  $R_{wp} = 0.079$ ,  $\chi^2 = 4.5$ ).

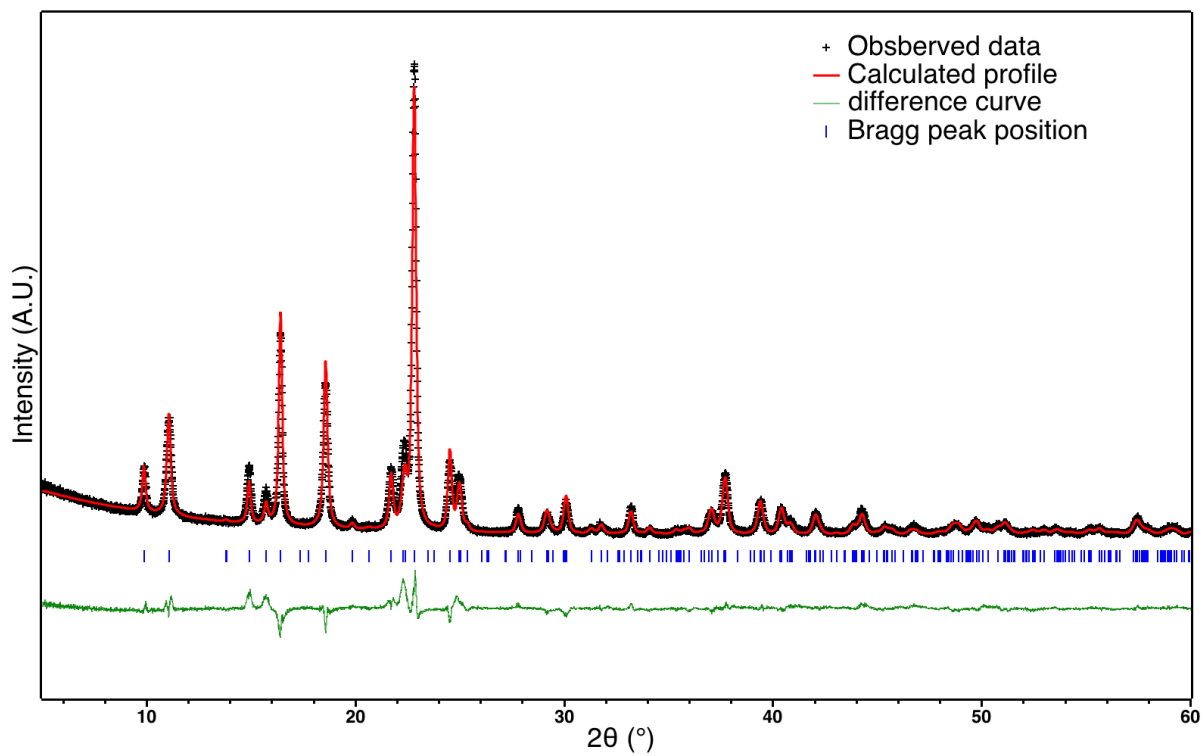

**Figure S13:** Crystal packing of the polymeric chains of a.  $[\text{Fe}(\text{Htrz})_2(\text{trz})](\text{PF}_6)$  compared to b.  $[\text{Fe}(\text{Htrz})_2(\text{trz})](\text{BF}_4)\cdot\text{I}$ . View along the a axis of the polymeric chains of c.  $[\text{Fe}(\text{Htrz})_2(\text{trz})](\text{PF}_6)$  compared to d.  $[\text{Fe}(\text{Htrz})_2(\text{trz})](\text{BF}_4)\cdot\text{I}$ . Red circles and arrow highlight the rotation of triazole ligand regarding the a axis.

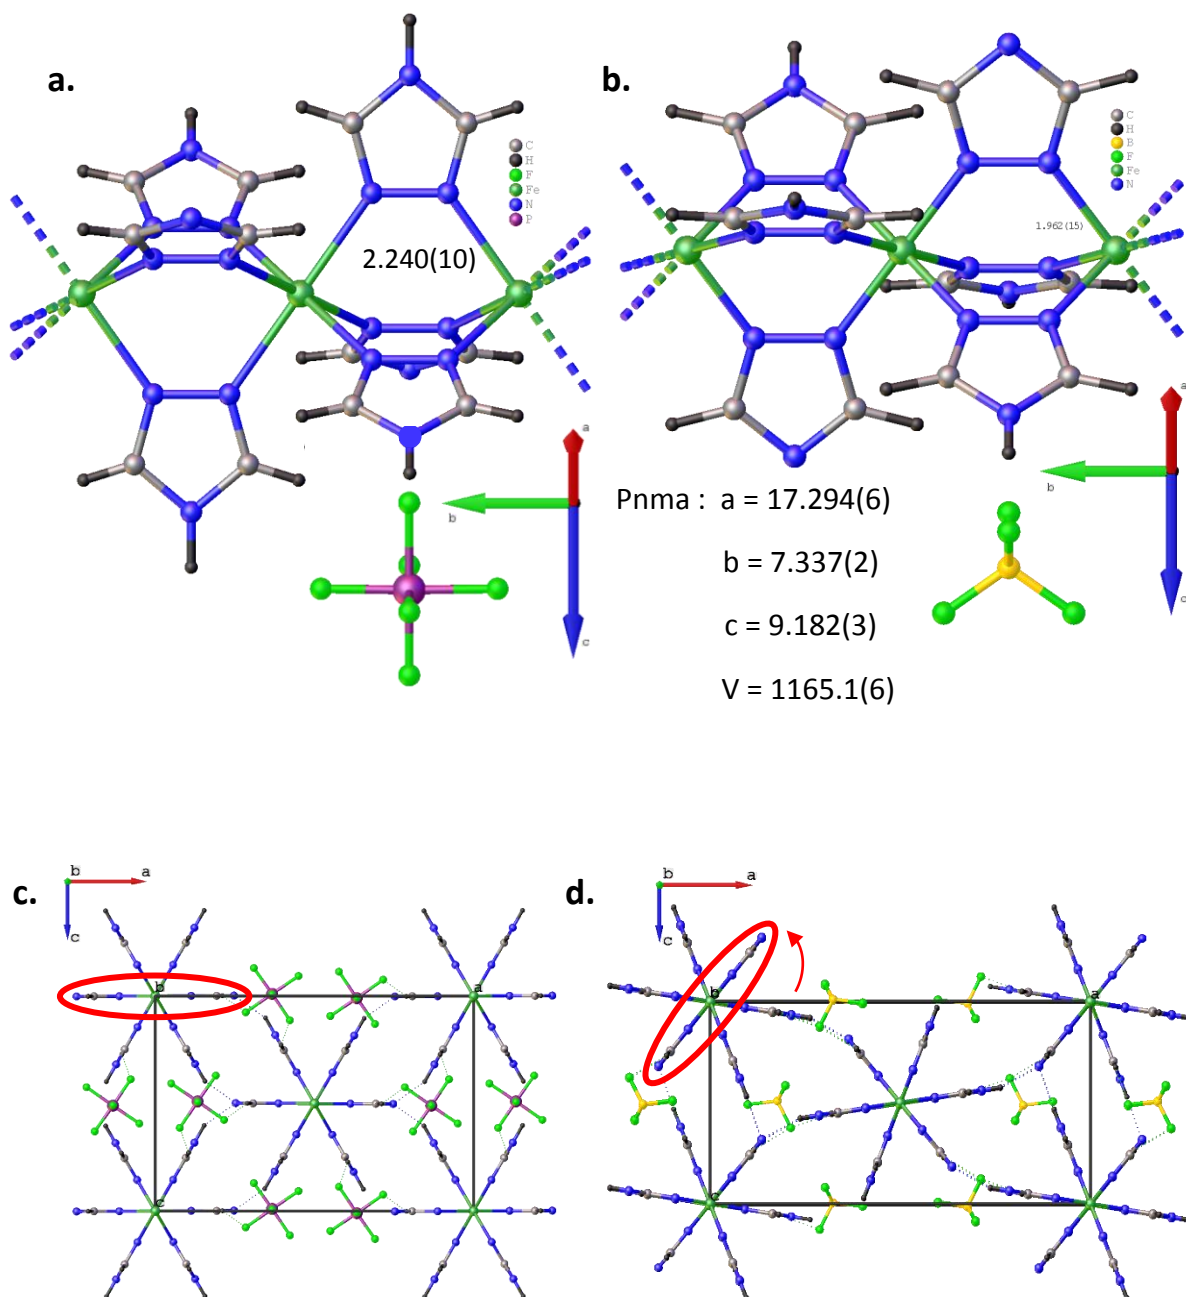

**Figure S14:** X-Ray powder pattern of the  $[\text{Fe}(\text{Htrz})_2(\text{trz})](\text{BF}_4)$  polymorph II, black crosses are experimental data, red continuous line is the calculated pattern from Rietveld refinement, continuous green line is the difference curve and green blue lines represent the Bragg peak positions ( $R_p = 0.067$ ;  $R_{wp} = 0.087$ )

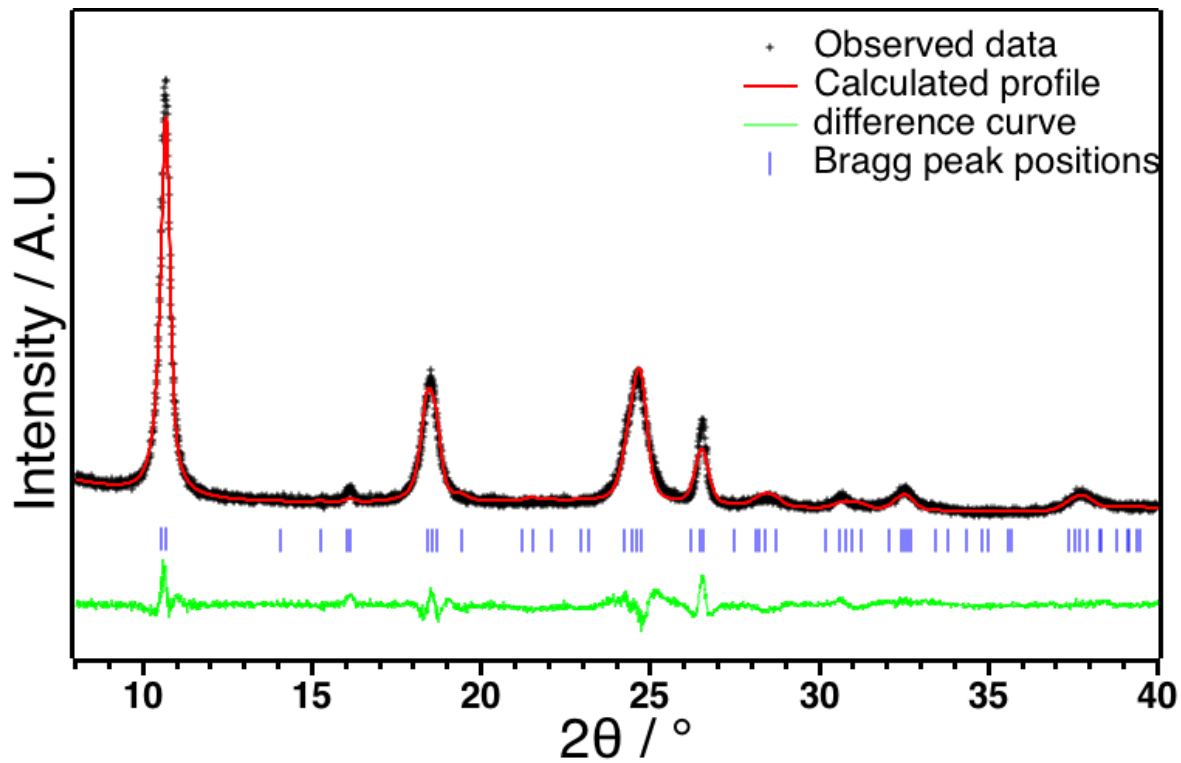

**Table SI1:** Magnetic data recorded for all 16 compounds at 5 kOe at the temperature scan rate of 0.7 K/min.

| Sample name     | $T_{1/2\uparrow}$ (K) | $T_{1/2\downarrow}$ (K) | $\Delta T$ | Phase                        |
|-----------------|-----------------------|-------------------------|------------|------------------------------|
| $C_2T_{20}$     | 360                   | 342                     | 18         | <b>II/Htrz<sub>3</sub></b>   |
| $C_1T_{20}$     | 354                   | 340                     | 14         | <b>II</b>                    |
| $C_{1/2}T_{20}$ | 364                   | 346                     | 18         | <b>II</b>                    |
| $C_{1/3}T_{20}$ | 373                   | 344                     | 29         | <b>II/I</b>                  |
| $C_{1/4}T_{20}$ | 376                   | 345                     | 31         | <b>I/II</b>                  |
| $C_{1/6}T_{20}$ | 378                   | 346                     | 32         | <b>I</b>                     |
| $C_{1/8}T_{20}$ | 376                   | 345                     | 31         | <b>I</b>                     |
| $C_2T_0$        | 358                   | 342                     | 16         | <b>I/Htrz<sub>3</sub>/II</b> |
| $C_1T_0$        | 372                   | 342                     | 30         | <b>II/Htrz<sub>3</sub></b>   |
| $C_{1/8}T_0$    | 378                   | 354                     | 24         | <b>Htrz<sub>3</sub>/I/II</b> |
| $C_2T_{50}$     | 363                   | 341                     | 22         | <b>I/Htrz<sub>3</sub>/II</b> |
| $C_1T_{50}$     | 378                   | 350                     | 28         | <b>I/II</b>                  |
| $C_{1/2}T_{50}$ | 383                   | 348                     | 35         | <b>I</b>                     |
| $C_{1/3}T_{50}$ | 382                   | 348                     | 34         | <b>I</b>                     |
| $C_2T_{80}$     | 380                   | 352                     | 28         | <b>I/Htrz<sub>3</sub></b>    |
| $C_1T_{80}$     | 385                   | 351                     | 34         | <b>I</b>                     |

**Figure S15:** TEM images of the 16 compounds and their corresponding phases.

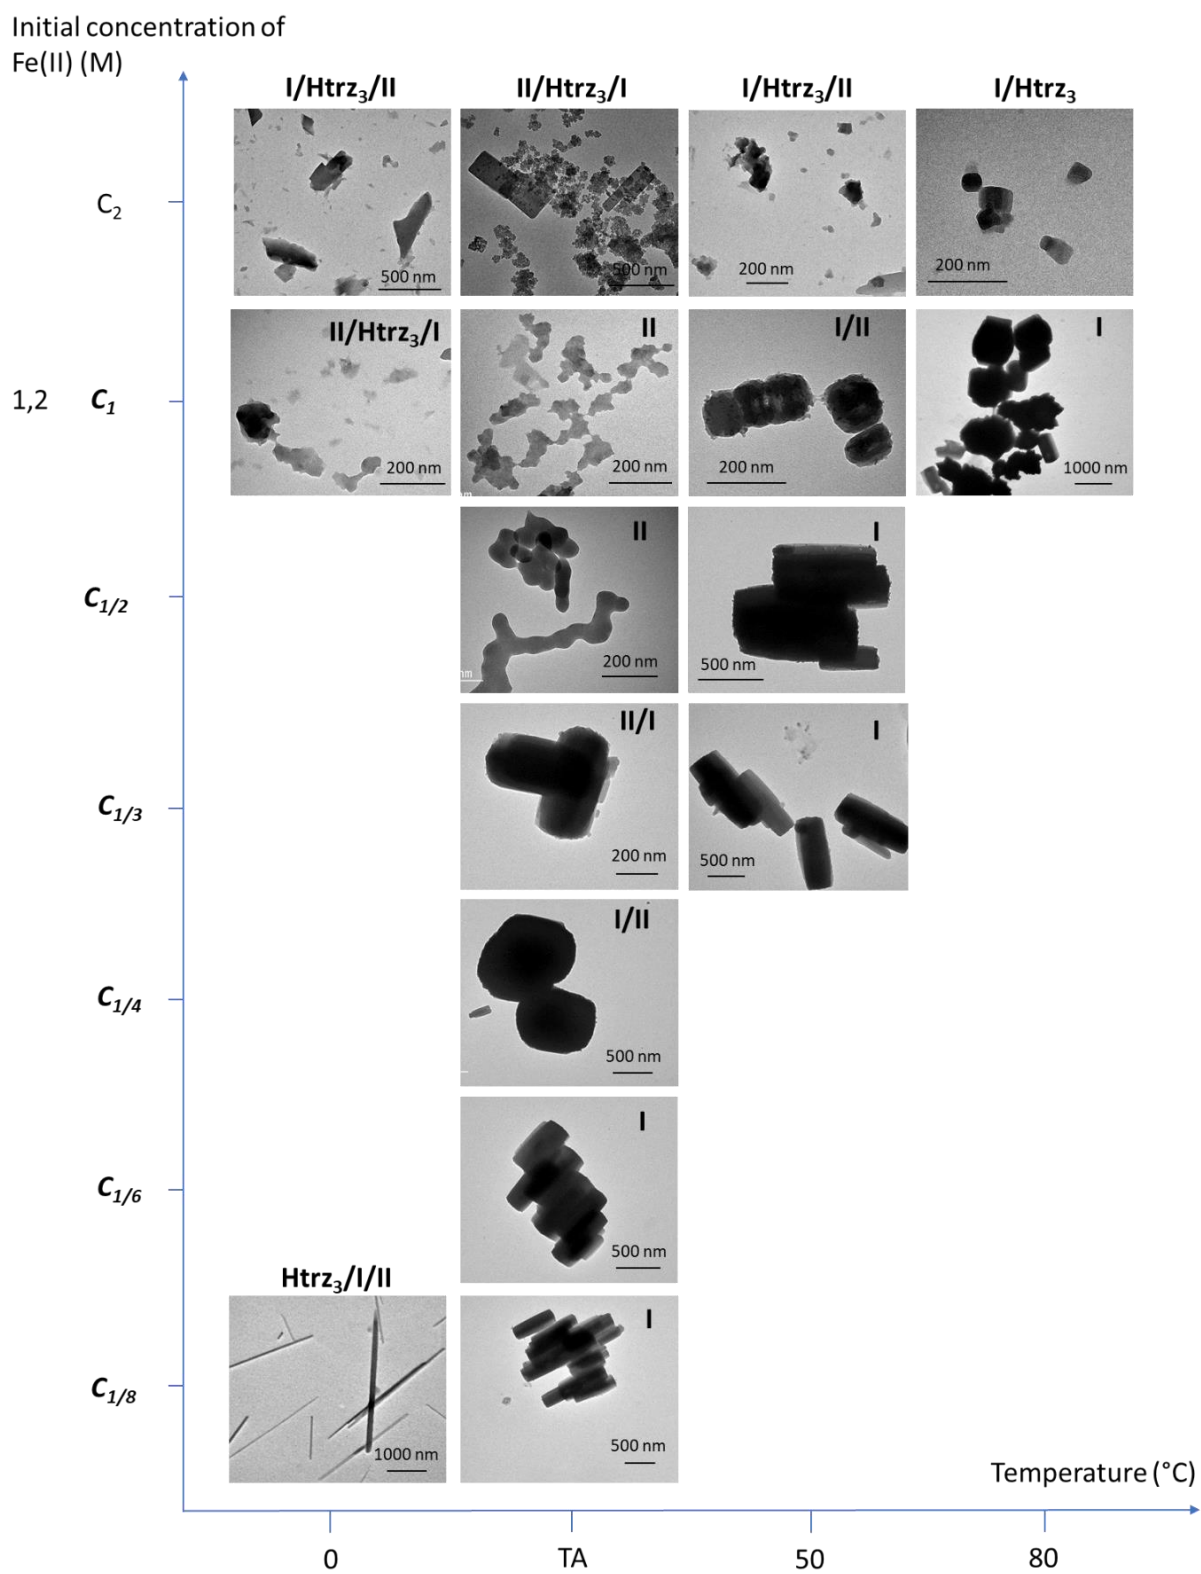



Figure S16: Powder X-Ray diffractograms of the 16 compounds.

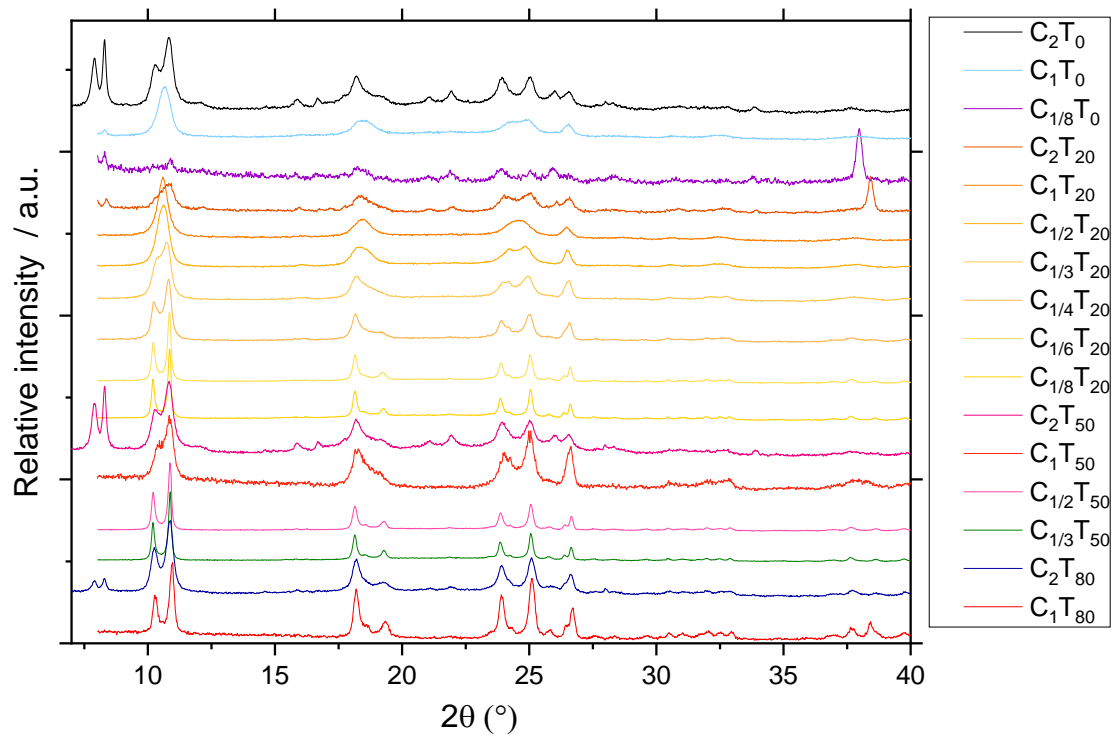

Figure S17: Thermal dependence of the  $\chi_{MT}$  product of the 16 compounds.

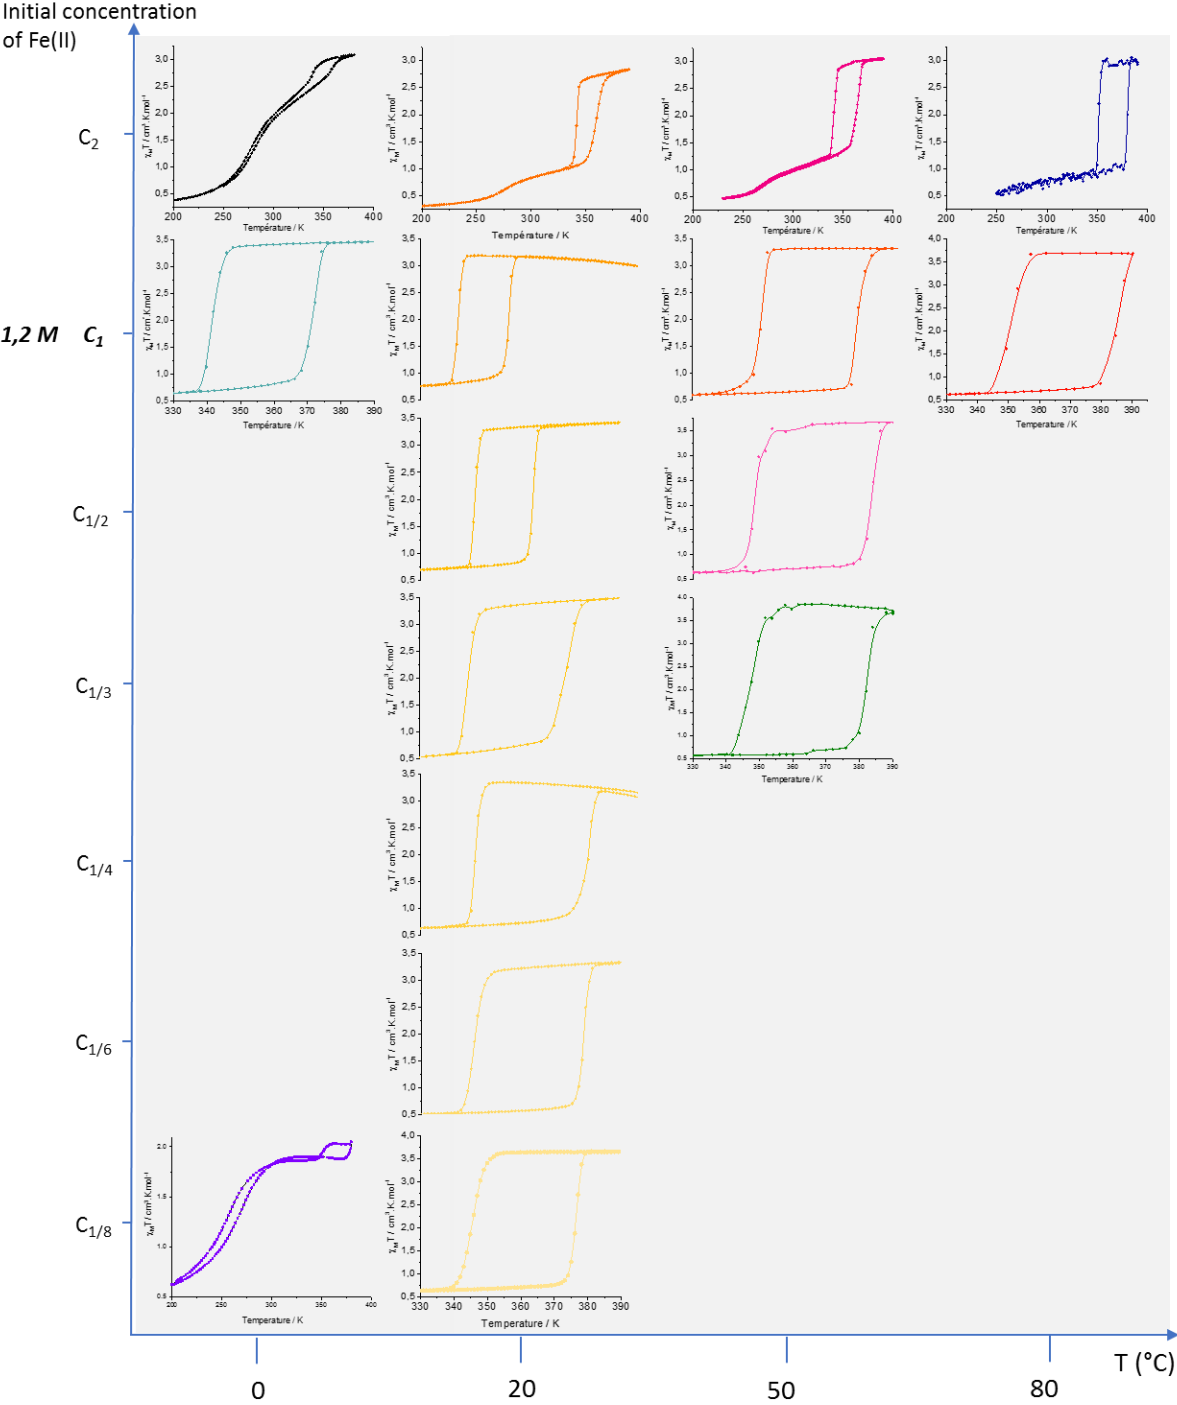

Supplement: d1qi00482d1.pdf [file d1qi00482d1.pdf]
